1 Mass Spectrometry Imaging of N-Glycans Reveals Racial Discrepancies in Low Grade Prostate  
2 Tumors

3  
4 **Lindsey R. Conroy<sup>1</sup>, Lyndsay E.A. Young<sup>2,3</sup>, Alexandra E. Stanback<sup>2</sup>, Grant L. Austin<sup>2</sup>,**  
5 **Jinpeng Liu<sup>3</sup>, Jinze Liu<sup>4</sup>, Derek B. Allison<sup>3,5</sup>, and Ramon C. Sun<sup>1,3,\*</sup>**

6  
7 <sup>1</sup>Department of Neuroscience, College of Medicine, University of Kentucky, Lexington, KY 40536,  
8 USA

9 <sup>2</sup>Department of Molecular and Cellular Biochemistry, College of Medicine, University of Kentucky,  
10 Lexington, KY 40536, USA

11 <sup>3</sup>Markey Cancer Center, Lexington, KY 40536, USA

12 <sup>4</sup>Department of Computer Science, College of Engineering, University of Kentucky, Lexington, KY  
13 40536, USA

14 <sup>5</sup>Department of Pathology and Laboratory Medicine, College of Medicine, University of Kentucky,  
15 Lexington, KY 40536, USA

16  
17 \*To whom correspondence should be addressed: Ramon Sun: Department of Neuroscience BBSRB  
18 B179, University of Kentucky, Lexington, KY, 40536-0509 USA; [ramon.sun@uky.edu](mailto:ramon.sun@uky.edu); Tel. +1  
19 (859)562-2298 Fax. +1 (859)323-5505

20  
21 The authors have declared that no conflict of interest exists.

22  
23 **Graphical Abstract**

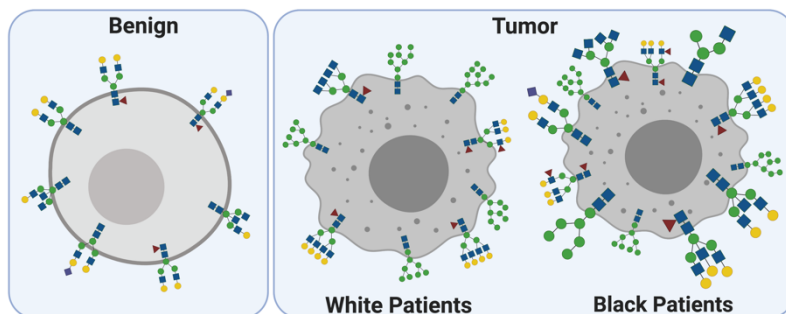

34  
35 **Abstract**

36  
37 Prostate cancer is the most common cancer in men worldwide. Despite its prevalence, there  
38 is a critical knowledge gap regarding the underlining molecular events that result in higher incidence  
39 and mortality rate in Black men. Identifying molecular features that separate racial disparities is a  
40 critical step in prostate cancer research that could lead to predictive biomarkers and personalized  
41 therapy. N-linked glycosylation is a co-translational event during protein folding that modulates a  
42 myriad of cellular processes. Recently, aberrant N-linked glycosylation has been reported in prostate  
43 cancers. However, the full clinical implications of dysregulated glycosylation in prostate cancer has  
44 yet to be explored. Herein, we performed high-throughput matrix-assisted laser desorption ionization  
45 mass spectrometry analysis to characterize the N-glycan profile from tissue microarrays of over 100  
46 patient tumors with over 10 years of follow up data. We identified several species of N-glycans that  
47 were profoundly different between low grade prostate tumors resected from White and Black  
48 patients. Further, these glycans predict opposing overall survival between White and Black patients  
49 with prostate cancer. These data suggest differential N-linked glycosylation underline the racial  
50 disparity of prostate cancer prognosis. Our study highlights the potential applications of MALDI-MSI  
51 for digital pathology and biomarker to study racial disparity of prostate cancer patients.

## 52 Introduction

53 Prostate cancer is the most common cancer in men and is the second leading cause of  
54 cancer-related mortality in men worldwide (1). Many factors contribute to the development and  
55 progression of prostate cancer including age, family history, ethnicity, and diet or lifestyle (2, 3).  
56 Patient prognosis largely depends on tumor grade, more specifically referred to as the “grade  
57 group”, which is determined by microscopic histopathologic examination (4, 5). While patients  
58 diagnosed with low grade prostate tumors have a 99% 5-year survival rate, patients with higher  
59 grade tumors and those who present with distant metastasis have significantly decreased survival  
60 (6). Standard treatment for prostate cancer includes active surveillance for patients with low grade  
61 tumors, localized therapy (radical prostatectomy and/or radiation) for intermediate and selected high  
62 grade tumors, and hormone therapy for patients with recurrence or metastatic disease (3). Despite  
63 the prognostic correlation with tumor grade group, racial disparities further contribute to prostate  
64 cancer patient outcomes. For example, Black males having a poorer prognosis compared to White  
65 males even when diagnosed with low grade prostate tumors (7-10). One critical knowledge gap in  
66 prostate cancer biology is the molecular events underlining higher incidence and mortality rates  
67 within this patient population, which could lead to better predictive biomarkers and personalized  
68 therapy.

69 N-linked glycosylation is a co-translational event necessary for cell surface, secreted, and  
70 circulating proteins (11, 12), wherein glycoconjugates containing N-acetylglucosamine (GlcNAc) are  
71 covalently attached to asparagine residues on the nascent carrier protein, followed by sequential  
72 addition of monosaccharides such as mannose, fucose, sialic acid, or GlcNAc (13, 14). Several  
73 biological processes are regulated by N-linked glycosylation including cell adhesion, immune  
74 modulation, cell-matrix interactions, and cell proliferation (15-19). Recent glycomic and proteomic  
75 studies have revealed extensive alterations in both the N-glycan profile and glycosyltransferase  
76 expression of several human cancers, including breast, lung, and prostate (20-22). Moreover,  
77 aberrant N-glycosylation has been shown to directly facilitate epithelial-to-mesenchymal transition  
78 (EMT) and subsequent metastatic potential of cancer cells by directly altering the activity of  
79 extracellular matrix proteins and growth factor signaling (23). Given the role of N-glycosylation during  
80 EMT and metastasis, defining the N-glycome of prostate tumors can provide insight into the  
81 molecular mechanisms driving prostate cancer progression and can be used to discover new  
82 biomarkers or potential novel therapies.

83 Matrix-assisted laser desorption/ionization-mass spectrometry imaging (MALDI-MSI) is a  
84 new and innovative technique in glycobiology that can be used to profile N-glycans with spatial  
85 distribution in formalin-fixed paraffin-embedded (FFPE) samples and high throughput analysis of  
86 tissue microarrays (TMA) (24-26). This novel approach uniquely utilizes 1) the enzyme peptide-N-  
87 glycosidase F (PNGase F) that cleaves bound N-linked glycans from glycoproteins *in situ*, and 2)  $\alpha$ -  
88 cyano-4-hydroxycinnamic acid (CHCA) ionization matrix for detection of N-linked glycans by MALDI-  
89 MSI (27). Previous studies have revealed distinct alterations in the N-glycan distribution between  
90 normal and prostate tumor tissue (22, 24, 28), with several of the N-glycan species elevated in  
91 prostate cancer being linked to EMT and metastasis (29-32). Current MALDI-MSI analyses of  
92 prostate cancer tissues have utilized large prostate tissue sections, and elegantly describe the N-  
93 glycan spatial differences between tumor and nontumor regions (22, 24, 28). Given these recent  
94 findings and the role of N-glycans in EMT, we hypothesized that N-glycan profiling may have  
95 potential to both define tumor grade and predict overall patient outcome in prostate cancer. We  
96 performed MALDI-MSI analysis on FFPE prostate cancer TMAs constructed from archived human  
97 prostate tissues from over 100 patients treated at the Markey Cancer Center. This patient data set  
98 included both cancer and matched normal tissue from racially and geographically diverse patients  
99 with over 10 years of follow-up data, allowing us to evaluate N-glycans as prognostic indicators for  
100 the clinical course of prostate cancer progression.

101 We observed significant N-glycan dysregulation between benign prostate tissue and tumor  
102 prostate tissue with several glycans tracking either positively or negatively with tumor grade group.

103 Specifically, high mannose as well as tri- and tetra-antennary glycans were more abundant within  
104 tumor tissue and correlated with increasing tumor grade. Further, we expanded our analyses to  
105 access glycosylation patterns in populations disproportionately affected by prostate cancer. We report  
106 that glycosylation does not differ between patients from Appalachian and non-Appalachian  
107 populations in Kentucky; however, we found striking differences in the N-glycan profiles of low stage  
108 prostate cancer tumors between Black and White patients. Moreover, these glycans also predict  
109 opposing survival outcomes between Black and White patients. This surprising data highlights  
110 fundamental differences in carbohydrate metabolism during early tumorigenesis between the Black  
111 and White patient populations. Overall, our data suggest that aberrant N-linked glycosylation  
112 contributes to prostate cancer progression, which highlights the clinical potential of MALDI-MSI  
113 analysis for novel biomarker discover, and emphasizes the need for personalized medicine for  
114 prostate cancer patients.

## 115 116 **Results**

### 117 118 ***Utilizing TMAs for high-throughput analysis of prostate cancer N-glycans by MALDI-MSI***

119 Previous MALDI-MSI analyses of prostate cancer tissue sections have revealed distinct  
120 differences in the spatial distribution of several species of N-glycans between tumor and nontumor  
121 regions (24, 28). We aimed to expand on these observations and utilize MALDI-MSI analysis to  
122 define the N-glycome of over 100 prostate cancer patients with demographical information and  
123 clinical course. We obtained FFPE prostate TMAs containing both benign prostate tissue and  
124 prostate tumor tissue with over 10 years of patient follow-up data from the Biospecimen  
125 Procurement and Translation Pathology Shared Resource Facility (BPTP SRF) of the Markey  
126 Cancer Center (Lexington, KY). The TMAs analyzed included patient samples of prostate cancer  
127 grade groups 1 through 5, and clinicopathological parameters included race, geographic location, as  
128 well as disease recurrence and patient survival (**Supplemental Table 1**). Utilizing the modern  
129 grading system, few patients are diagnosed with grade group 4 prostate cancer at radical  
130 prostatectomy (33), and this fact is reflected in our cohort of patients with only three grade group 4  
131 patient samples. Therefore, these samples were omitted from the analysis due to a low statistical  
132 power. TMA slides were prepared using previously established MALDI-MSI workflow (24, 27). First,  
133 bound N-glycans were cleaved from glycoproteins by the addition of PNGaseF; then, CHCA, an  
134 ionization matrix was applied uniformly using the HTX high velocity dry-spraying robot (34).  
135 Released N-glycans were analyzed using a Waters Synapt G2 ion-mobility enabled mass  
136 spectrometer equipped with an Nd:YAG UV laser (**Figure 1A**). Ion mobility improved glycan  
137 detection by separating N-glycans from ionization matrix based on differential collision cross section  
138 (**Figure 1B**). Using this method, we detected 46 N-glycans across all tissue samples (**Figure 1C** and  
139 **Supplemental Table 2**). Representative HDI images of the four most abundant N-glycans (1501,  
140 1663, 1809, and 1976 m/z) are shown in **Figure 1D-G**. Interestingly, these biantennary complex N-  
141 glycans, while sharing a common core structure, show a wide range of abundance across the TMA.

### 142 143 ***Core fucosylated, bisecting, and sialylated N-glycans are predominantly found in benign*** 144 ***tissue***

145 Core fucosylation is an important N-glycan modification wherein a fucose moiety is added via  
146  $\alpha$ 1,6-linkage to the innermost GlcNAc residue, altering the activity of the attached protein.  
147 Specifically, fucosylation of cell membrane receptors and proteins such as EGFR, TGF $\beta$ , E-cadherin,  
148 and integrins influences ligand binding, receptor dimerization, and signaling capacities (35-38). Core  
149 fucosylation is frequently increased in tumor tissue and inhibiting the addition of a core fucose  
150 moiety to glycans reduces cancer progression (39). Despite these findings, we observed a decrease  
151 in both the core fucosylated (1485, 1647, and 1809 m/z) (**Figure 2A-C**) and non-fucosylated (1339,  
152 1501, and 1663 m/z) (**Figure 2D-F**) structures of several biantennary N-glycans in prostate tumor  
153 tissue compared to benign. Further, the abundance of these specific N-glycans decreased with

154 tumor grade group. These results suggest that reductions in certain core fucosylated glycan species  
155 are part of N-glycan reprogramming in prostate cancer and may play a role in prostate cancer  
156 tumorigenesis.

157 Bisecting N-glycans are another class of N-glycans that play a role in cancer progression.  
158 This class is characterized by the addition of a  $\beta$ 1,4-linked GlcNAc to the  $\beta$ -mannose residue of the  
159 glycan core, which inhibits further processing and elongation by glycosyltransferases (26, 40, 41).  
160 Accumulation of bisecting N-glycans correlates to anti-tumorigenic potential in cancer cells by  
161 limiting the formation of larger complex glycan structures (42, 43). Consistent with this observation,  
162 we found that two bisecting N-glycans (1542 and 1704 m/z) predominantly accumulated in benign  
163 prostate tissue compared to prostate tumor tissue, which decreased with tumor grade group  
164 (**Supplemental Figure 1A-B**); one bisecting N-glycan remained unaffected (1866 m/z)  
165 (**Supplemental Figure 1C**). Our findings support the notion that bisecting N-glycans are anti-  
166 tumorigenic and play a protective role in cancer progression.

167 Sialic acids are terminal monosaccharides on N-glycans that project into the extracellular  
168 environment, and play an important role in protein-protein interaction and cellular recognition (44).  
169 Sialylation is one of the building blocks to form the cancer-associated sialyl-Lewis antigens, which  
170 have been shown to be involved in cell adhesion by selectin interaction (45, 46). Moreover,  
171 sialylation in tumor tissue is known to be a mechanism of resistance to cell death and may protect  
172 cells from infiltrating immune cells, thereby inhibiting immune surveillance (47). We found that two  
173 sialylated N-glycans (1976 and 2122 m/z) were more abundant in benign prostate tissue compared  
174 to prostate tumor tissue, which decreased with tumor grade group (**Supplemental Figure 1D-E**);  
175 one sialylated N-glycan was unchanged (2341m/z) (**Supplemental Figure 1F**). These data suggest  
176 N-glycan sialylation is not a major driver of immune surveillance or modulating the microenvironment  
177 immune landscape during prostate cancer progression.

178  
179 ***Prostate tumors exhibit increased high-mannose and branched complex N-glycans in a grade***  
180 ***group-dependent manner***

181 Previous MALDI-MSI analyses of prostate cancer tissue sections have revealed distinct  
182 differences in the spatial distribution of several species of N-glycans between tumor and nontumor  
183 regions (24, 28). Specifically, high-mannose glycans were almost exclusively detected in prostate  
184 tumor tissue. We aimed to expand on these observations and identify glycans that accumulate with  
185 increased tumor grade group. Consistent with previous findings, prostate tumor tissue exhibited  
186 higher abundance of several high-mannose N-glycans (1581, 1743, and 1905 m/z) compared to  
187 benign prostate tissue, which increased with tumor grade group (**Figure 3A-C**). High-mannose  
188 glycans are produced early in the N-glycan biosynthetic pathway, wherein mannose residues are  
189 sequentially added to the growing glycan chain in the ER, followed by further processing by  
190 mannosidases and glycotransferases into more structurally diverse complex and hybrid glycans in  
191 the Golgi apparatus (48, 49). High-mannose glycans are routinely detected in high abundance in  
192 cancer tissues and have been implicated in the progression of several human cancers including  
193 liver, lung, and breast (50-52). Together, combined with previous studies, our data highlights the  
194 clinical relevance of high-mannose glycans in prostate cancer. Additionally, these data suggest  
195 prostate tumors exhibit either incomplete N-glycan biosynthesis or enhanced mannose metabolism  
196 that contributes to prostate cancer progression.

197 Other glycans that correlated positively with tumor grade group include several branched  
198 complex N-glycans (2320, 1891, and 2539 m/z) with a core fucose residue (**Figure 3D-F**). Increased  
199 tri- and tetra-antennary branched glycan structures have been linked to many aspects of  
200 tumorigenesis including neoplastic transformation, cell proliferation, and abnormal cell morphology  
201 (26, 53). Moreover, it's been demonstrated that the addition of tri- and tetra- antennary branched  
202 glycans to E-cadherin impairs cell adhesion and promotes tumor cell invasion (54). Our findings  
203 suggest increased prostate cancer tumorigenesis is through similar mechanisms. Notably, core  
204 fucosylated biantennary complex glycans are lower in prostate tumor tissue and decrease with tumor



205 grade group (**Figure 2A-C**), while tri- and tetra-antennary complex glycans show an opposing trend  
206 (**Figure 3D-F**). These data suggest glycan branching, rather than core fucosylation, plays a greater  
207 role in prostate cancer tumorigenesis.

208

### 209 ***Elevated high mannose and complex N-glycans in prostate tumor tissue are not prognostic*** 210 ***markers for disease progression across all patient populations***

211 Higher tumor grade groups are typically associated with poorer patient outcomes in prostate  
212 cancer (4, 6). Therefore, we hypothesized that high mannose and branched complex N-glycans  
213 would predict the clinical course of prostate cancer progression. To assess this, we took advantage  
214 of the 10 year follow-up data linked to the patient samples on the prostate TMA. First, we analyzed  
215 the relative abundance of each glycan with respect to whether or not that patient had disease  
216 recurrence. Surprisingly, we found that the relative abundance of both species of N-glycans was not  
217 altered between patients who did not have disease recurrence compared to those with local or  
218 regional recurrence (**Figure 4-F**). Second, we assessed the relative abundance of each glycan with  
219 overall survival for each patient. Linear regression analysis revealed that increased abundance of  
220 high-mannose and branched complex N-glycans did not correlate to better or poorer overall survival  
221 for patients (**Figure 4G-L**). To our surprise, even though high mannose and branched complex  
222 glycans correlated positively with tumor grade group, they did not correlate with recurrence and  
223 overall survival across all patient populations. These data suggest that there are other co-founding  
224 factors that contribute to prostate cancer progression. It is well known that health disparities exist  
225 within prostate cancer patient cohorts, specifically in men from rural Appalachia and Black men (7-  
226 10, 55-57). Thus, we hypothesize that these distinct patient populations have unique glycan  
227 signatures that contribute to the lack of correlation between glycan abundance and patient outcome  
228 in our initial analysis.

229

### 230 ***N-glycosylation does not contribute to poorer survival in prostate cancer patients from rural*** 231 ***Appalachia***

232 Several epidemiological studies have revealed prostate cancer patients from rural  
233 Appalachia have poorer overall survival despite having lower incidence compared to patients from  
234 non-Appalachian counties (56). Yet, the molecular mechanisms underlining this health disparity are  
235 largely unknown. As our patient cohort includes patients within Kentucky residing in Appalachian and  
236 non-Appalachian counties, we hypothesized N-glycan dysregulation contributes to poorer outcomes  
237 for patients from rural Appalachia. We compared the relative abundance of all 46 N-glycans between  
238 Appalachian and non-Appalachian patients by grade group, and found no significant differences in  
239 N-glycan abundance for several species of N-glycans, including high-mannose (**Supplemental**  
240 **Figure 2A**), bisecting (**Supplemental Figure 2B**), sialylated (**Supplemental Figure 2C**), or core  
241 fucosylated (**Supplemental Figure 2D**). Abundance of these specific glycans is not altered between  
242 patients who did not have disease recurrence compared to those with local or regional recurrence  
243 for Appalachian status (**Supplemental Figure 3A-D**). Moreover, we did not observe any significant  
244 difference in the correlation between glycan abundance and overall survival between Appalachian  
245 versus non-Appalachian patients (**Supplemental Figure 3A-D**). Our data suggest N-glycosylation  
246 does not contribute to prostate cancer progression in Appalachian patients, and it supports the  
247 notion that late diagnosis, rather than underlining molecular features, drives the health disparity  
248 between Appalachian and non-Appalachian prostate cancer patients (56).

249

### 250 ***N-glycosylation contributes to the health disparity in Black prostate cancer patients***

251 While increasing evidence suggests that molecular and genetic alterations contribute to the  
252 racial disparity between Black and White prostate cancer patients (58-61), how specific differences  
253 in tumor biology drive accelerated disease progression in Black men remains largely unknown. Our  
254 TMAs included a cohort of black patients treated at the Markey Cancer Center. Therefore, we  
255 expanded our analysis to examine the N-glycan profile of White and Black prostate cancer patient

256 samples, and whether those differences contributed to the health disparity in Black men. We  
257 analyzed the relative abundance of all 46 N-glycans detected between Black and White patient  
258 samples, stratified by grade group, and found 9 structurally diverse glycans that were elevated in  
259 grade group 1 tumors of Black patients. These N-glycans included pauci-mannose (**Figure 5A, B**),  
260 biantennary complex (**Figure 5C**), sialylated (**Figure 5D**), core fucosylated (**Figure 5E, F**), bisecting  
261 (**Figure 5G, H**), and tetra-antennary complex (**Figure 5I**) N-glycans. Several of the glycans elevated  
262 in low grade tumors from Black patients compared to White were unchanged in benign tissue.  
263 Notably, high-mannose and complex glycans that were found to be elevated in prostate tumor tissue  
264 from our initial analysis (**Figure 3**) were not significantly altered between Black and White patient  
265 samples (**Supplemental Figure 4A-E**). This finding suggests we have identified a glycan signature  
266 that is unique to low grade tumors from Black patients, which could inform novel early diagnostic  
267 strategies and novel treatment strategies for this patient population. We stratified relative abundance  
268 for all nine glycans elevated in grade group 1 tumors by recurrence between Black and White  
269 patients, and did not observe any significant difference in glycan abundance between Black and  
270 White patients who had local disease recurrence compared to those with none (**Supplemental**  
271 **Figure 5**). Our patient cohort did not include tumor samples from Black patients with regional  
272 recurrence, thus we excluded regional recurrence from our analyses between Black and White  
273 patients. Strikingly, six of the nine glycans that are accumulated in low grade tumors predict  
274 opposing overall survival between Black and White patients (**Figure 6**). This surprising data  
275 suggests the fundamental changes in N-glycan metabolism that occur during early tumorigenesis  
276 between the White and Black patients potentially contribute to the health disparity in prostate cancer  
277 disease progression.

## 278 279 **Discussion**

280 An increasing body of evidence suggests that aberrant N-glycosylation plays a key role in  
281 several aspects of tumorigenesis, such as tumor cell invasion and metastasis, cell-matrix  
282 interactions, tumor angiogenesis, and cell signaling and communication (20). With the advent of new  
283 high throughput mass spectrometry based technologies, such as MALDI-MSI, N-linked glycomic  
284 profiling of patient tumor tissues has demonstrated remarkable potential for early diagnosis, risk  
285 prediction, and treatment outcome for several cancers (62). Moreover, MALDI-MSI analysis of N-  
286 glycans provides insight into the function of N-linked glycosylation in tumor metabolism and cancer  
287 progression (63, 64). The use of TMAs is advantageous for high-throughput investigation during a  
288 single experiment using widely available FFPE patient samples, often including clinical follow-up  
289 data. In the present study, we utilized prostate cancer TMAs including benign and tumor tissue  
290 resected from over 100 patients with 10 years of clinical follow-up data to perform N-glycan profiling  
291 by MALDI-MSI analysis. We found specific glycan signatures between benign compared to prostate  
292 tumor tissue. Further, we have identified a unique glycan profile in low grade tumors from Black  
293 compared to White prostate cancer patients, which potentially contributes to the racial disparity in  
294 prostate cancer.

295 We observed significant dysregulations in multiple species of N-glycans between benign  
296 prostate tissue and prostate tumor tissue. Specifically, prostate tumors exhibit accumulation of high-  
297 mannose glycans which increase with tumor grade group (**Figure 3A-C**), a common feature of  
298 human cancers that correlates with more aggressive cancer phenotypes (20, 21). Accumulation of  
299 high mannose N-glycans in prostate tumors suggests a lack of N-glycan trimming reactions and a  
300 decrease in mannosidase activity, or aberrant mannose metabolism (50-52). Additionally, we found  
301 prostate tumors accumulate tri- and tetra-antennary complex glycans containing a core fucose  
302 moiety (**Figure 3D-F**), suggesting prostate tumors have enhanced GlcNAc metabolism. N-glycan  
303  $\beta$ 1,6-branching, which gives rise to these structures, has been implicated in several tumorigenic  
304 processes including neoplastic transformation, cell proliferation, and abnormal cell morphology (26,  
305 53). Our findings suggest that increased N-glycan  $\beta$ 1,6-branching and the accumulation of high-  
306 mannose glycans contribute to prostate cancer progression. Despite high-mannose and branched N-

glycans increasing with tumor grade group, these specific glycans were not able to predict the clinical course of prostate cancer progression over a 10 year follow-up interval in the present study (**Figure 4**). Future analyses should be extended to longer follow-up intervals and a wider spread of clinical behaviors (responses to therapy, co-morbidities, etc.) to define the prognostic value of these specific glycans in prostate cancer. We also found several species of N-glycans were elevated in benign tissue compared to prostate cancer tumors, including core fucosylated, bisecting, and sialylated glycans (**Figure 2, Supplemental Figure 1**). Strikingly, biantennary complex glycans with a core fucose moiety are lower in prostate tumor tissue and decrease with tumor grade group (**Figure 4A-C**), while tri- and tetra-antennary core fucosylated glycans are increased (**Figure 3D-F**), suggesting branching, rather than core fucosylation, contributes to prostate cancer progression.

Health disparities among different prostate cancer patient populations have been well documented, with men from rural Appalachia and Black men having higher mortality rates (7-10, 56). Yet, the molecular mechanisms driving poorer patient outcomes in these distinct populations are largely unknown. Our patient cohort is unique in that it includes samples from two disproportionately affected populations. We found N-glycan status is not a good classifier to separate the Appalachian and non-Appalachian patient population, which supports the hypothesis that late diagnosis, or other confounding factors, contribute to the health disparity in this population (**Supplemental Figure 2 and 3**). Conversely, we found several structurally diverse N-glycans that differentially accumulated between White and Black prostate cancer patients (**Figure 5**), that were distinct from the high-mannose and complex glycans that were found to be elevated in prostate tumor tissue from our initial analysis (**Figure 3, Supplemental Figure 4A-E**). Furthermore, these glycans predict opposing overall survival between each patient population (**Figure 6**). This finding suggests we have identified a glycan signature that is unique to low grade tumors from Black patients, which could be an important prognostic tool to predict stage 1 prostate tumors in the black population, hence warranting future validation. These data also raise the concern that Black and White patients would potentially respond to treatment options differently, and/or whether more targeted therapeutics are required for Black patients. Future experiments should include defining the molecular perturbations of N-glycan metabolism in Black prostate cancer patients, as identifying these features could lead to key to developing novel disease biomarkers and personalize therapies for this disproportionately affected population.

In summary, our data suggest that aberrant N-linked glycosylation contributes to prostate cancer progression, and identifies high-mannose, as well as branched glycans, as potential disease biomarkers. Moreover, our study is the first to define the N-glycan profiles between prostate tumors from Black and White patient populations, and suggest differences in N-glycosylation is a molecular feature in low grade tumors that potentially contributes to the health disparity in prostate cancer disease progression. Overall, these results warrant investigation to define glycan metabolism and the regulatory mechanisms that contribute to aberrant protein glycosylation in prostate cancer, with an emphasis on defining the unique features of low grade prostate tumors from Black patients, as they relate to patient prognosis. Future studies should be expanded to include glycoproteomic analysis to define the specific proteins that are differentially glycosylated. Such studies can provide insight into the molecular drivers of prostate cancer progression and health disparities, which can be used to discover new biomarkers and novel personalized therapies.

### **Limitations of Study**

This study employs cutting edge mass spectrometry imaging to identify tumor specific and patient demographic alterations in N-glycosylation in prostate cancer. While MALDI-MSI is a powerful tool for high-throughput N-glycan profiling of a large number of patient samples, we are still limited by the patient cohort selected for this study. For our targeted demographic analysis, sample size was small for several groups, thus future studies should include more patients to confirm our findings. Moreover, we analyzed prostate tumors from small tissue cores rather than larger tissue sections containing both tumor and nontumor stroma regions. As many tumor cores are not purely

358 tumor tissue, this could contribute to increase variance in our results. future analyses should be  
359 expanded to define N-glycosylation in different tumor regions defined by microenvirental pressure in  
360 larger prostate tumor tissue sections.

361

## 362 Methods

### 363 *Chemicals and Reagents*

364 High-performance liquid chromatography-grade acetonitrile, ethanol, methanol, water, alpha-cyano-  
365 4-hydroxycinnamic acid (CHCA) and Trifluoroacetic acid (TFA) were purchased from Sigma-Aldrich.  
366 Histological-grade xylenes was purchased from Spectrum Chemical. Citraconic anhydride for  
367 antigen retrieval was obtained from Thermo Fisher Scientific. Recombinant PNGaseF Prime was  
368 obtained from Bulldog Bio, Inc. (Portsmouth, NH, USA).

369

370

### 371 *Clinical Prostate Cancer FFPE Tissue Microarrays*

372 Tissue microarrays (TMAs) were created from residual FFPE radical prostatectomy samples by the  
373 Biospecimen Procurement and Translation Pathology Shared Resource Facility (BPTP SRF) of the  
374 Markey Cancer Center (MCC) with approval from the institutional review board (IRB). These  
375 specimens were coupled with de-identified demographic and clinical data provided by the Cancer  
376 Research Informatics (CRI) SRF and the MCC with approval from the IRB. The TMAs contained  
377 prostate tumor tissue (n=112 samples) and benign prostate tissue (n=30 samples) from 112  
378 patients. 21/112 patient tumor samples were grade group 1; 48/112 were grade group 2; 21/112  
379 were grade group 3; 3/112 were grade group 4; and 15/112 were grade group 5. **Supplemental**  
380 **Table 1**. All tissues were de-identified to the analytical investigators.

381

### 382 *Tissue Preparation and Enzyme Digestion*

383 FFPE TMA slides were processed as previously described (1, 2). In brief, tissues were dewaxed and  
384 rehydrated followed by antigen retrieval in citraconic anhydride buffer (25 $\mu$ l citraconic anhydride, 2 $\mu$ l  
385 12 M HCl, and 50 $\mu$ l HPLC-grade water, pH 3.0-3.5). Recombinant PNGase F (0.1 $\mu$ g/ $\mu$ l) was applied  
386 using an M5 TMSprayer Robot (HTX Technologies LLC, Chapel Hill, NC). Enzyme was sprayed  
387 onto the slide at a rate of 25 $\mu$ l /min with a 0mm offset and a velocity of 1200mm/min at 45°C and  
388 10psi for 15 passes, followed by a 2-hour incubation at 37°C in a prewarmed humidity chamber.  
389 After incubation, slides were desiccated and 7mg/ml CHCA matrix in 50% acetonitrile with 0.1% TFA  
390 was applied at 0.1ml/min with a 2.5mm offset and a velocity of 1300mm/min at 79°C and 10psi for  
391 10 passes using the M5 Sprayer. Slides were stored in a desiccator or immediately used for MALDI-  
392 MSI analysis.

393

### 394 *N-Glycan MALDI-MSI Analysis*

395 A Waters Synapt G2Si mass spectrometer (Waters Corporation, Milford, MA) equipped with an  
396 Nd:YAG UV laser with a spot size of 50 $\mu$ m was used to detect released N-glycans at X and Y  
397 coordinates of 75 $\mu$ m. Data acquisition, spectrums were uploaded to High Definition Imaging (HDI)  
398 Software (Waters Corporation) for mass range analysis from 750 to 3500m/z. For N-glycan  
399 quantification, regions of interest (ROI) were defined for each patient sample on the TMAs using HDI  
400 image ROI drawing tool. For all pixels defined within a ROI, peak intensities were averaged and  
401 normalized by total ion current. HDI generated glycan images were obtained for most abundant N-  
402 glycans detected across all patient samples. Representative glycan structures were generated in  
403 GlycoWorkbench.

404

### 405 *Statistics*

406 Statistical analyses were carried out using GraphPad Prism. All numerical data are presented as  
407 individual data points or mean  $\pm$  S.E.M. Grouped analysis was performed using two-way ANOVA.  
408 Column analysis was performed using one-way ANOVA or unpaired t-test when appropriate. XY



409 analysis was performed using simple linear regression. A p-value less than 0.05 was considered  
410 statistically significant.

411

#### 412 *Study Approval*

413 TMAs containing human prostate tissue were created by the BPTP SRF of the MCC with approval  
414 from the IRB. Samples were coupled with de-identified demographic and clinical data provided by  
415 the CRI SRF of the MCC with approval from the IRB. Use of the tissue and de-identified information  
416 for the purpose of this study was given an exempt status from the IRB.

417

#### 418 Author Contributions

419 RCS and DBA conceptualized the study and designed experiments. LRC, LEAY and AES performed  
420 the experiments. LRC, JL, MSG, and GLA analyzed the data and generated figures. LRC, GLA,  
421 MSG, and RCS wrote the manuscript. All authors read and approved the manuscript.

422

#### 423 Acknowledgements

424 This study was supported by NIH grant R01 AG066653, St Baldrick's Career Development Award,  
425 and Rally Foundation Independent Investigator Grant. This research was also supported by funding  
426 from the University of Kentucky Markey Cancer Center and the NIH-funded Biospecimen  
427 Procurement & Translational Pathology Shared Resource Facility, as well as the Cancer Research  
428 Informatics Shared Resource Facility, of the University of Kentucky Markey Cancer Center  
429 P30CA177558.

430

#### 431 References

432

433

- 434 1. Siegel RL, Miller KD, Jemal A. Cancer statistics, 2020. *CA Cancer J Clin.* 2020;70(1):7-30.
- 435 2. Attard G, Parker C, Eeles RA, Schröder F, Tomlins SA, Tannock I, et al. Prostate cancer.  
436 *Lancet.* 2016;387(10013):70-82.
- 437 3. Litwin MS, Tan HJ. The Diagnosis and Treatment of Prostate Cancer: A Review. *Jama.*  
438 2017;317(24):2532-42.
- 439 4. Santoni M, Piva F, Scarpelli M, Cheng L, Lopez-Beltran A, Massari F, et al. The origin of  
440 prostate metastases: emerging insights. *Cancer Metastasis Rev.* 2015;34(4):765-73.
- 441 5. Epstein JI, Zelefsky MJ, Sjoberg DD, Nelson JB, Egevad L, Magi-Galluzzi C, et al. A  
442 Contemporary Prostate Cancer Grading System: A Validated Alternative to the Gleason Score. *Eur*  
443 *Urol.* 2016;69(3):428-35.
- 444 6. Harris KS, Kerr BA. Prostate Cancer Stem Cell Markers Drive Progression, Therapeutic  
445 Resistance, and Bone Metastasis. *Stem Cells Int.* 2017;2017:8629234.
- 446 7. Bhardwaj A, Srivastava SK, Khan MA, Prajapati VK, Singh S, Carter JE, et al. Racial  
447 disparities in prostate cancer: a molecular perspective. *Front Biosci (Landmark Ed).* 2017;22:772-82.
- 448 8. Kim HS, Moreira DM, Jayachandran J, Gerber L, Bañez LL, Vollmer RT, et al. Prostate  
449 biopsies from black men express higher levels of aggressive disease biomarkers than prostate  
450 biopsies from white men. *Prostate Cancer Prostatic Dis.* 2011;14(3):262-5.
- 451 9. Singh SK, Lillard JW, Jr., Singh R. Molecular basis for prostate cancer racial disparities.  
452 *Front Biosci (Landmark Ed).* 2017;22:428-50.
- 453 10. Zhang W, Dong Y, Sartor O, Flemington EK, Zhang K. SEER and Gene Expression Data  
454 Analysis Deciphers Racial Disparity Patterns in Prostate Cancer Mortality and the Public Health  
455 Implication. *Sci Rep.* 2020;10(1):6820.
- 456 11. Imperiali B, O'Connor SE. Effect of N-linked glycosylation on glycopeptide and glycoprotein  
457 structure. *Current opinion in chemical biology.* 1999;3(6):643-9.
- 458 12. Schwarz F, Aebi M. Mechanisms and principles of N-linked protein glycosylation. *Current*  
459 *opinion in structural biology.* 2011;21(5):576-82.

- 460 13. Stanley P. Golgi glycosylation. *Cold Spring Harbor perspectives in biology*.  
461 2011;3(4):a005199.
- 462 14. Bieberich E. Synthesis, Processing, and Function of N-glycans in N-glycoproteins. *Adv*  
463 *Neurobiol*. 2014;9:47-70.
- 464 15. Hsiao CT, Cheng HW, Huang CM, Li HR, Ou MH, Huang JR, et al. Fibronectin in cell  
465 adhesion and migration via N-glycosylation. *Oncotarget*. 2017;8(41):70653-68.
- 466 16. Jennewein MF, Alter G. The Immunoregulatory Roles of Antibody Glycosylation. *Trends*  
467 *Immunol*. 2017;38(5):358-72.
- 468 17. Li CW, Lim SO, Xia W, Lee HH, Chan LC, Kuo CW, et al. Glycosylation and stabilization of  
469 programmed death ligand-1 suppresses T-cell activity. *Nat Commun*. 2016;7:12632.
- 470 18. Li H, Al-Japairai K, Tao Y, Xiang Z. RPN2 promotes colorectal cancer cell proliferation  
471 through modulating the glycosylation status of EGFR. *Oncotarget*. 2017;8(42):72633-51.
- 472 19. Marsico G, Russo L, Quondamatteo F, Pandit A. Glycosylation and Integrin Regulation in  
473 Cancer. *Trends Cancer*. 2018;4(8):537-52.
- 474 20. Pinho SS, Reis CA. Glycosylation in cancer: mechanisms and clinical implications. *Nat Rev*  
475 *Cancer*. 2015;15(9):540-55.
- 476 21. Stowell SR, Ju T, Cummings RD. Protein glycosylation in cancer. *Annu Rev Pathol*.  
477 2015;10:473-510.
- 478 22. West CA, Liang H, Drake RR, Mehta AS. New Enzymatic Approach to Distinguish  
479 Fucosylation Isomers of N-Linked Glycans in Tissues Using MALDI Imaging Mass Spectrometry. *J*  
480 *Proteome Res*. 2020.
- 481 23. Li X, Wang X, Tan Z, Chen S, Guan F. Role of Glycans in Cancer Cells Undergoing  
482 Epithelial-Mesenchymal Transition. *Front Oncol*. 2016;6:33.
- 483 24. Powers TW, Neely BA, Shao Y, Tang H, Troyer DA, Mehta AS, et al. MALDI imaging mass  
484 spectrometry profiling of N-glycans in formalin-fixed paraffin embedded clinical tissue blocks and  
485 tissue microarrays. *PLoS One*. 2014;9(9):e106255.
- 486 25. Toghi Eshghi S, Yang S, Wang X, Shah P, Li X, Zhang H. Imaging of N-linked glycans from  
487 formalin-fixed paraffin-embedded tissue sections using MALDI mass spectrometry. *ACS Chem Biol*.  
488 2014;9(9):2149-56.
- 489 26. Drake RR, Powers TW, Jones EE, Bruner E, Mehta AS, Angel PM. MALDI Mass  
490 Spectrometry Imaging of N-Linked Glycans in Cancer Tissues. *Adv Cancer Res*. 2017;134:85-116.
- 491 27. Drake RR, Powers TW, Norris-Caneda K, Mehta AS, Angel PM. In Situ Imaging of N-  
492 Glycans by MALDI Imaging Mass Spectrometry of Fresh or Formalin-Fixed Paraffin-Embedded  
493 Tissue. *Curr Protoc Protein Sci*. 2018;94(1):e68.
- 494 28. Drake RR, Jones EE, Powers TW, Nyalwidhe JO. Altered glycosylation in prostate cancer.  
495 *Adv Cancer Res*. 2015;126:345-82.
- 496 29. Ishibashi Y, Tobisawa Y, Hatakeyama S, Ohashi T, Tanaka M, Narita S, et al. Serum tri- and  
497 tetra-antennary N-glycan is a potential predictive biomarker for castration-resistant prostate cancer.  
498 *Prostate*. 2014;74:1521-9.
- 499 30. Kyselova Z, Mechref Y, Al Bataineh M, Dobrolecki L, Hickey R, Vinson J, et al. Alterations in  
500 the serum glycome due to metastatic prostate cancer. *Journal of Proteome Research*. 2007;6:1822-  
501 32.
- 502 31. Newsom-Davis T, Wang D, Steinman L, Chen P, Wang L, Simon A, et al. Enhanced immune  
503 recognition of cryptic glycan markers in human tumors. *Cancer Research*. 2009;69:2018-25.
- 504 32. Pinho S, Oliveira P, Cabral J, Carvalho S, Huntsman D, Gartner F, et al. Loss and recovery  
505 of Mgat3 and GnT-III mediated E-cadherin N-glycosylation is a mechanism involved in epithelial-  
506 mesenchymal-epithelial transitions. *PLoS ONE*. 2012;7:e33191.
- 507 33. Kryvenko ON, Williamson SR, Schwartz LE, Epstein JI. Gleason score 5 + 3 = 8 (grade group  
508 4) prostate cancer-a rare occurrence with contemporary grading. *Hum Pathol*. 2020;97:40-51.
- 509 34. Andres DA, Young LEA, Gentry MS, Sun RC. Spatial profiling of gangliosides in mouse brain  
510 by mass spectrometry imaging. *J Lipid Res*. 2020.

- 511 35. Tu C-F, Wu M-Y, Lin Y-C, Kannagi R, Yang R-B. FUT8 promotes breast cancer cell  
512 invasiveness by remodeling TGF- $\beta$  receptor core fucosylation. *Breast Cancer Research*.  
513 2017;19(1):111.
- 514 36. Ezawa I, Sawai Y, Kawase T, Okabe A, Tsutsumi S, Ichikawa H, et al. Novel p53 target gene  
515 FUCA1 encodes a fucosidase and regulates growth and survival of cancer cells. *Cancer Sci*.  
516 2016;107(6):734-45.
- 517 37. Liu YC, Yen HY, Chen CY, Chen CH, Cheng PF, Juan YH, et al. Sialylation and fucosylation  
518 of epidermal growth factor receptor suppress its dimerization and activation in lung cancer cells.  
519 *Proc Natl Acad Sci U S A*. 2011;108(28):11332-7.
- 520 38. Listinsky JJ, Listinsky CM, Alapati V, Siegal GP. Cell surface fucose ablation as a  
521 therapeutic strategy for malignant neoplasms. *Adv Anat Pathol*. 2001;8(6):330-7.
- 522 39. Keeley TS, Yang S, Lau E. The Diverse Contributions of Fucose Linkages in Cancer.  
523 *Cancers (Basel)*. 2019;11(9).
- 524 40. Link-Lenczowski P, Bubka M, Balog CIA, Koeleman CAM, Butters TD, Wuhrer M, et al. The  
525 glycomic effect of N-acetylglucosaminyltransferase III overexpression in metastatic melanoma cells.  
526 GnT-III modifies highly branched N-glycans. *Glycoconj J*. 2018;35(2):217-31.
- 527 41. Zhao Y, Nakagawa T, Itoh S, Inamori K, Isaji T, Kariya Y, et al. N-  
528 acetylglucosaminyltransferase III antagonizes the effect of N-acetylglucosaminyltransferase V on  
529 alpha3beta1 integrin-mediated cell migration. *J Biol Chem*. 2006;281(43):32122-30.
- 530 42. Song Y, Aglipay JA, Bernstein JD, Goswami S, Stanley P. The bisecting GlcNAc on N-  
531 glycans inhibits growth factor signaling and retards mammary tumor progression. *Cancer Res*.  
532 2010;70(8):3361-71.
- 533 43. Taniguchi N, Kizuka Y. Glycans and cancer: role of N-glycans in cancer biomarker,  
534 progression and metastasis, and therapeutics. *Adv Cancer Res*. 2015;126:11-51.
- 535 44. Hall MK, Weidner DA, Dayal S, Schwalbe RA. Cell surface N-glycans influence the level of  
536 functional E-cadherin at the cell-cell border. *FEBS Open Bio*. 2014;4:892-7.
- 537 45. Christiansen MN, Chik J, Lee L, Anugraham M, Abrahams JL, Packer NH. Cell surface  
538 protein glycosylation in cancer. *Proteomics*. 2014;14(4-5):525-46.
- 539 46. Magnani JL. The discovery, biology, and drug development of sialyl Lea and sialyl Lex. *Arch*  
540 *Biochem Biophys*. 2004;426(2):122-31.
- 541 47. Schultz MJ, Swindall AF, Bellis SL. Regulation of the metastatic cell phenotype by sialylated  
542 glycans. *Cancer Metastasis Rev*. 2012;31(3-4):501-18.
- 543 48. Pabst M, Grass J, Toegel S, Liebming E, Strasser R, Altmann F. Isomeric analysis of  
544 oligomannosidic N-glycans and their dolichol-linked precursors. *Glycobiology*. 2012;22(3):389-99.
- 545 49. Tulsiani D, Hubbard S, Robbins P, Touster O. alpha-D-Mannosidases of rat liver Golgi  
546 membranes. Mannosidase II is the GlcNAcMAN5-cleaving enzyme in glycoprotein biosynthesis and  
547 mannosidases Ia and IB are the enzymes converting Man9 precursors to Man5 intermediates.  
548 *Journal of Biological Chemistry*. 1982;257(7):3660-8.
- 549 50. de Leoz ML, Young LJ, An HJ, Kronewitter SR, Kim J, Miyamoto S, et al. High-mannose  
550 glycans are elevated during breast cancer progression. *Mol Cell Proteomics*.  
551 2011;10(1):M110.002717.
- 552 51. Lattova E, Skrickova J, Hausnerova J, Frola L, Kren L, Ihnatova I, et al. N-Glycan profiling of  
553 lung adenocarcinoma in patients at different stages of disease. *Mod Pathol*. 2020.
- 554 52. Nie H, Liu X, Zhang Y, Li T, Zhan C, Huo W, et al. Specific N-glycans of Hepatocellular  
555 Carcinoma Cell Surface and the Abnormal Increase of Core-alpha-1, 6-fucosylated Triantennary  
556 Glycan via N-acetylglucosaminyltransferases-IVa Regulation. *Sci Rep*. 2015;5:16007.
- 557 53. Kizuka Y, Taniguchi N. Enzymes for N-Glycan Branching and Their Genetic and Nongenetic  
558 Regulation in Cancer. *Biomolecules*. 2016;6(2).
- 559 54. Pinho SS, Figueiredo J, Cabral J, Carvalho S, Dourado J, Magalhaes A, et al. E-cadherin  
560 and adherens-junctions stability in gastric carcinoma: functional implications of glycosyltransferases  
561 involving N-glycan branching biosynthesis, N-acetylglucosaminyltransferases III and V. *Biochim*  
562 *Biophys Acta*. 2013;1830(3):2690-700.

- 563 55. Lengerich EJ, Tucker TC, Powell RK, Colsher P, Lehman E, Ward AJ, et al. Cancer  
564 incidence in Kentucky, Pennsylvania, and West Virginia: disparities in Appalachia. *J Rural Health*.  
565 2005;21(1):39-47.
- 566 56. Myint ZW, O'Neal R, Chen Q, Huang B, Vanderpool R, Wang P. Disparities in prostate  
567 cancer survival in Appalachian Kentucky: a population-based study. *Rural Remote Health*.  
568 2019;19(2):4989.
- 569 57. Yao N, Alcalá HE, Anderson R, Balkrishnan R. Cancer Disparities in Rural Appalachia:  
570 Incidence, Early Detection, and Survivorship. *J Rural Health*. 2017;33(4):375-81.
- 571 58. Karakas C, Wang C, Deng F, Huang H, Wang D, Lee P. Molecular mechanisms involving  
572 prostate cancer racial disparity. *Am J Clin Exp Urol*. 2017;5(3):34-48.
- 573 59. Smith CJ, Minas TZ, Ambs S. Analysis of Tumor Biology to Advance Cancer Health Disparity  
574 Research. *Am J Pathol*. 2018;188(2):304-16.
- 575 60. Tan SH, Petrovics G, Srivastava S. Prostate Cancer Genomics: Recent Advances and the  
576 Prevailing Underrepresentation from Racial and Ethnic Minorities. *Int J Mol Sci*. 2018;19(4).
- 577 61. Xiao J, Cohen P, Stern MC, Odedina F, Carpten J, Reams R. Mitochondrial biology and  
578 prostate cancer ethnic disparity. *Carcinogenesis*. 2018;39(11):1311-9.
- 579 62. Kailemia MJ, Park D, Lebrilla CB. Glycans and glycoproteins as specific biomarkers for  
580 cancer. *Anal Bioanal Chem*. 2017;409(2):395-410.
- 581 63. Bennun SV, Yarema KJ, Betenbaugh MJ, Krambeck FJ. Integration of the transcriptome and  
582 glycome for identification of glycan cell signatures. *PLoS Comput Biol*. 2013;9(1):e1002813.
- 583 64. Peng W, Zhu R, Zhou S, Mirzaei P, Mechref Y. Integrated Transcriptomics, Proteomics, and  
584 Glycomics Reveals the Association between Up-regulation of Sialylated N-glycans/Integrin and  
585 Breast Cancer Brain Metastasis. *Sci Rep*. 2019;9(1):17361.

586  
587  
588  
589  
590  
591  
592  
593  
594  
595  
596  
597  
598  
599  
600  
601  
602  
603  
604  
605  
606  
607  
608  
609  
610  
611  
612  
613  
614



615  
616  
617  
618  
619  
620  
621  
622  
623  
624  
625  
626  
627  
628  
629  
630  
631  
632  
633  
634  
635  
636  
637  
638  
639  
640  
641  
642  
643  
644  
645  
646  
647  
648  
649  
650  
651  
652  
653  
654  
655  
656  
657  
658  
659  
660  
661  
662  
663  
664  
665

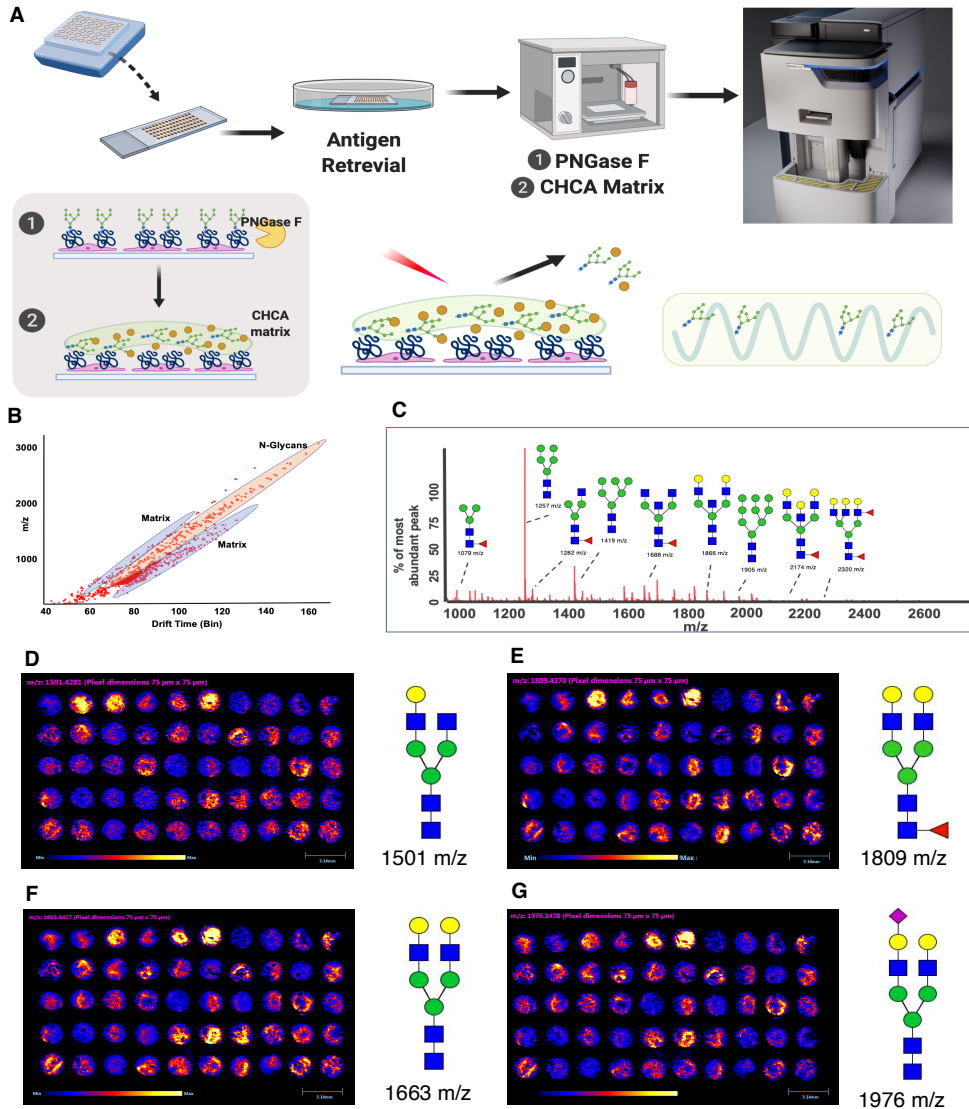

**Figure 1. Overview of MALDI-MSI workflow for N-glycan detection in prostate cancer TMAs.**

(A) Schematic workflow of N-glycan imaging using MALDI coupled to high resolution mass spectrometry. In brief, FFPE TMAs were sectioned to 5 $\mu$ m followed by dewaxing and antigen retrieval. Slides were treated with PNGase F to release N-glycans followed by CHCA (ionization matrix) application using an HTX high velocity sprayer. Glycans and matrix were ionized using a Nd:YAG UV laser and were separated by ion mobility. Glycan mass spectra were acquired by Waters Synapt G2 high resolution mass spectrometer. (B) Scatter plot of monoisotopic mass versus drift time in the ion mobility cell for N-glycans and the MALDI matrix. (C) Extracted ion chromatogram of released N-glycans based on ion mobility separation. Structures of several detected glycans are shown on the plot. (D) HDI images of 1501 m/z, (E) 1809 m/z, (F) 1663 m/z, and (G) 1976 m/z. Intensity and size scales are located beneath the image. Blue: least abundant, Yellow: most abundant. Glycan structures are placed on the right side of their corresponding image. Structure key: blue square-N-acetylglucosamine, green circle-mannose, yellow circle-galactose, purple diamond-sialic acid, and red triangle-fucose. Scale bar-3.14mm.

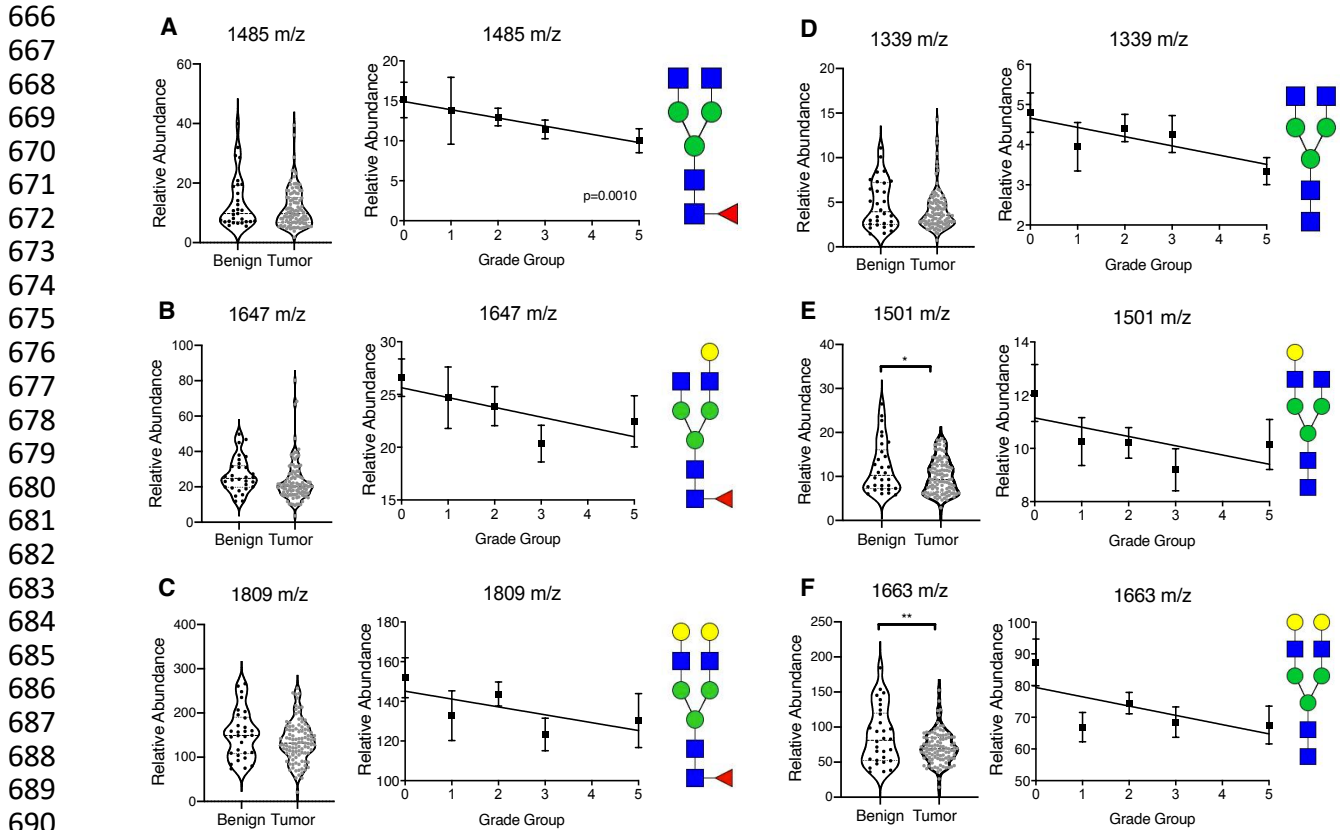

**Figure 2. Prostate tumor tissue exhibits decreased abundance of biantennary N-glycans with and without a core fucose.** N-glycan relative abundance for benign versus grouped prostate tumor tissue (left), relative abundance stratified by tumor grade (middle), and representative structure (right) for biantennary N-glycans with: **(A)** 1485 m/z, **(B)** 1809 m/z, **(C)** 1647 m/z and with core fucose modification: **(D)** 1339 m/z, **(E)**, 1501 m/z, and **(F)** 1663 m/z. Values represent mean  $\pm$  S.E.M. analyzed by student's t-test (benign vs grouped tumor tissue) or simple linear regression. Benign (n=30), grade group 1 tumors (n=21), grade group 2 tumors (n=48), grade group 3 tumors (n=21), and group grade 5 tumors (n=15).  $p < 0.05$ . Structure key: blue square-N-acetylglucosamine, green circle-mannose, yellow circle-galactose, purple diamond-sialic acid, and red triangle-fucose.

717  
718  
719  
720  
721  
722  
723  
724  
725  
726  
727  
728  
729  
730  
731  
732  
733  
734  
735  
736  
737  
738  
739  
740  
741  
742  
743  
744  
745  
746  
747  
748  
749  
750  
751  
752  
753  
754  
755  
756  
757  
758  
759  
760  
761  
762  
763  
764  
765  
766  
767

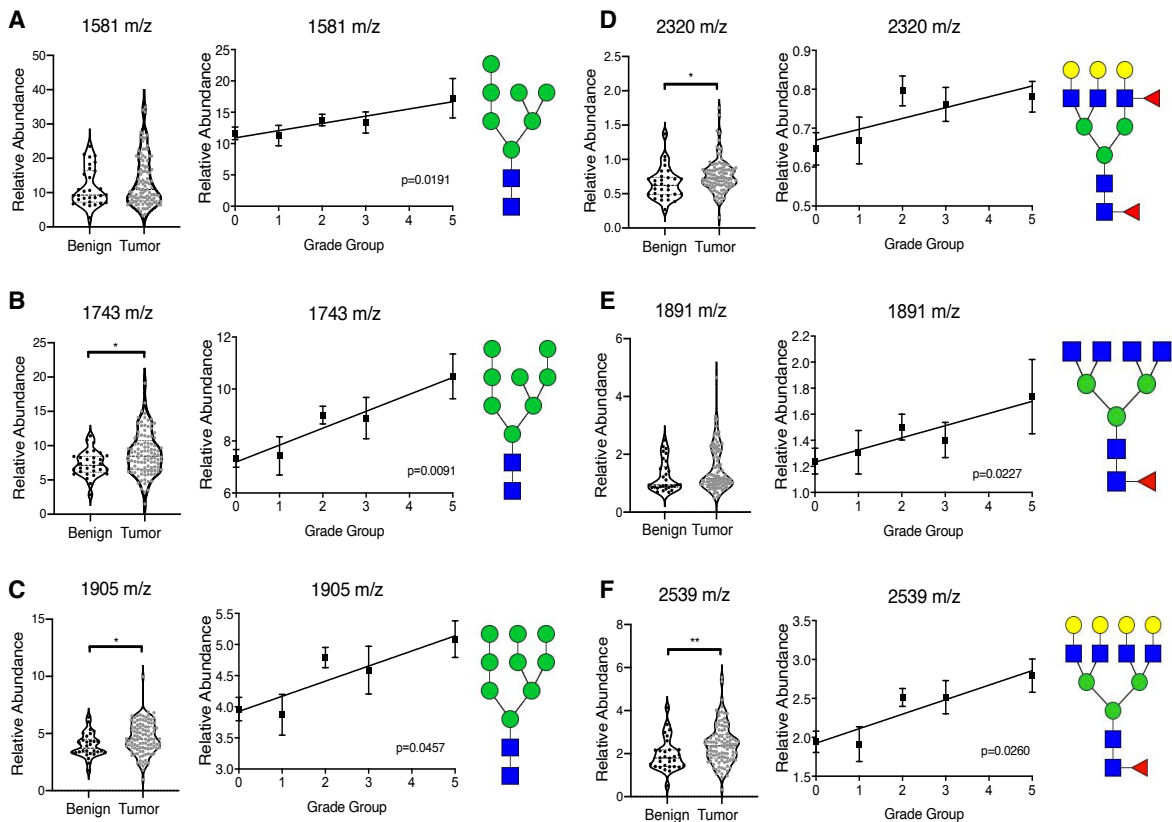

**Figure 3. Prostate tumor tissue exhibits increased abundance of high mannose as well as tri- and tetra-antennary N-glycans proportional to tumor grade.** N-glycan relative abundance for benign versus grouped prostate tumor tissue (left), relative abundance stratified by tumor grade group (middle), and representative structure (right) for high mannose N-glycans: (A) 1581 m/z, (B) 1743 m/z, (C) 1905 m/z and complex tri-/tetra-antennary N-glycans: (D) 2320 m/z, (E), 1891 m/z, and (F) 2539 m/z. Benign (n=30), grade group 1 tumors (n=21), grade group 2 tumors (n=48), grade group 3 tumors (n=21), and grade group 5 tumors (n=15). Values represent mean  $\pm$  S.E.M. analyzed by student's t-test (benign vs grouped tumor tissue) or simple linear regression.  $p < 0.05$  and  $**p < 0.01$ . Structure key: blue square-N-acetylglucosamine, green circle-mannose, yellow circle-galactose, purple diamond-sialic acid, and red triangle-fucose.

768  
769  
770  
771  
772  
773  
774  
775  
776  
777  
778  
779  
780  
781  
782  
783  
784  
785  
786  
787  
788  
789  
790  
791  
792  
793  
794  
795  
796  
797  
798  
799  
800  
801  
802  
803  
804  
805  
806  
807  
808  
809  
810  
811  
812  
813  
814  
815  
816  
817  
818

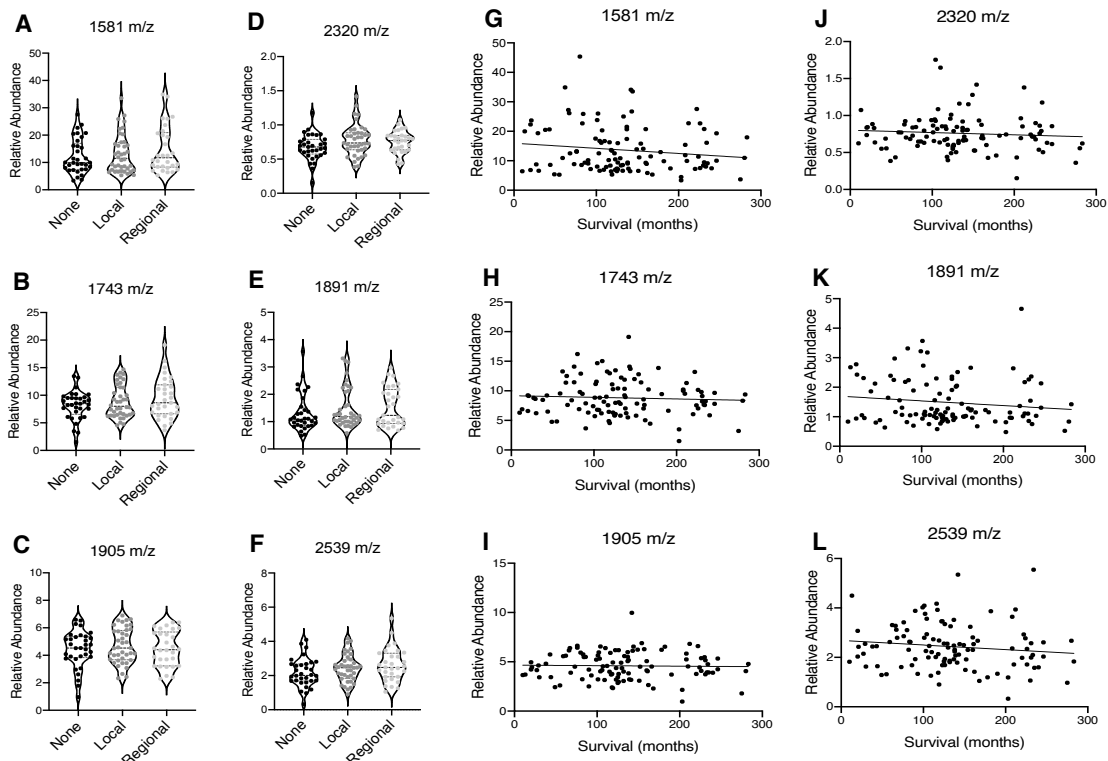

**Figure 4. Elevated high mannose and complex N-glycans in prostate tumor tissue are not prognostic markers for disease progression across all patient populations.** N-glycan relative abundance stratified by disease recurrence for high mannose N-glycans: (A) 1581 m/z, (B) 1743 m/z, (C) 1905 m/z, and complex tri-/tetra-antennary N-glycans: (D) 2320 m/z, (E), 1891 m/z, and (F) 2539 m/z. Data are plotted as individual patient samples, analyzed by One-way ANOVA. No recurrence/None (n=33), local recurrence (n=40), and regional recurrence (n=31). Correlation of relative abundance to overall patient survival for high mannose N-glycans: (G) 1581 m/z, (H) 1743 m/z, (I) 1905 m/z, and complex tri-/tetra-antennary N-glycans: (J) 2320 m/z, (K), 1891 m/z, and (L) 2539 m/z. Data are plotted as individual patient samples, analyzed by simple linear regression analysis (n=108).



819  
820  
821  
822  
823  
824  
825  
826  
827  
828  
829  
830  
831  
832  
833  
834  
835  
836  
837  
838  
839  
840  
841  
842  
843  
844  
845  
846  
847  
848  
849  
850  
851  
852  
853  
854  
855  
856  
857  
858  
859  
860  
861  
862  
863  
864  
865  
866  
867  
868  
869

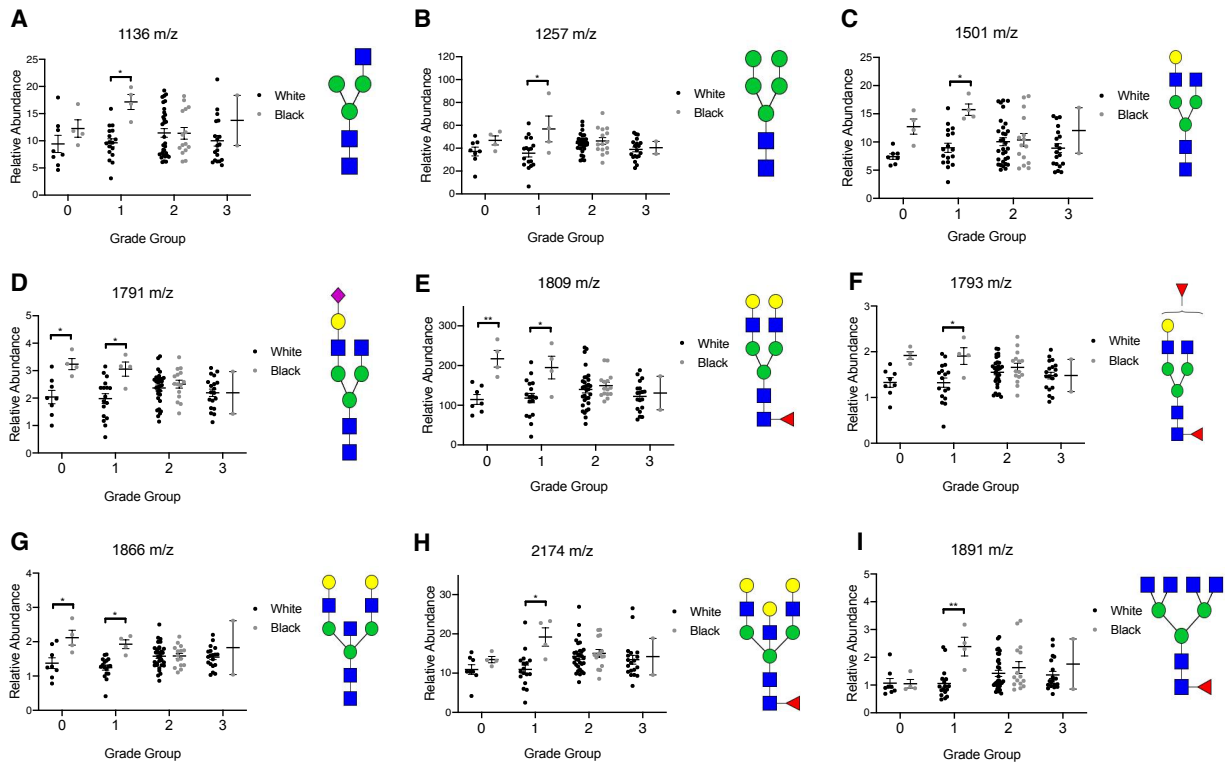

**Figure 5. Low grade prostate cancer tumors between Black and White patients exhibit significantly different N-glycan profiles.** N-glycan relative abundance for White versus Black patient samples stratified by tumor grade (left), and representative structure (right) for (A) 1136 m/z (pauci-mannose), (B) 1257 m/z (pauci-mannose), (C) 1501 m/z (bi-antennary complex), (D) 1791 m/z (sialylated), (E) 1809 m/z (core fucosylated), (F) 1793 m/z (core fucosylated), (G) 1866 m/z (bisecting), (H) 2174 m/z (bisecting/core fucosylated), and (I) 1891 m/z (tetra-antennary complex/core fucosylated). Error bars represent mean  $\pm$  S.E.M. analyzed by Two-way ANOVA. White: benign (n=8), grade group 1 tumors (n=17), grade group 2 tumors (n=31), and grade group 3 tumors (n=19). Black: benign (n=4), grade group 1 tumors (n=4), grade group 2 tumors (n=15), and grade group 3 tumors (n=2).  $p < 0.05$  and  $**p < 0.01$ . Structure key: blue square-N-acetylglucosamine, green circle-mannose, yellow circle-galactose, purple diamond-sialic acid, and red triangle-fucose.

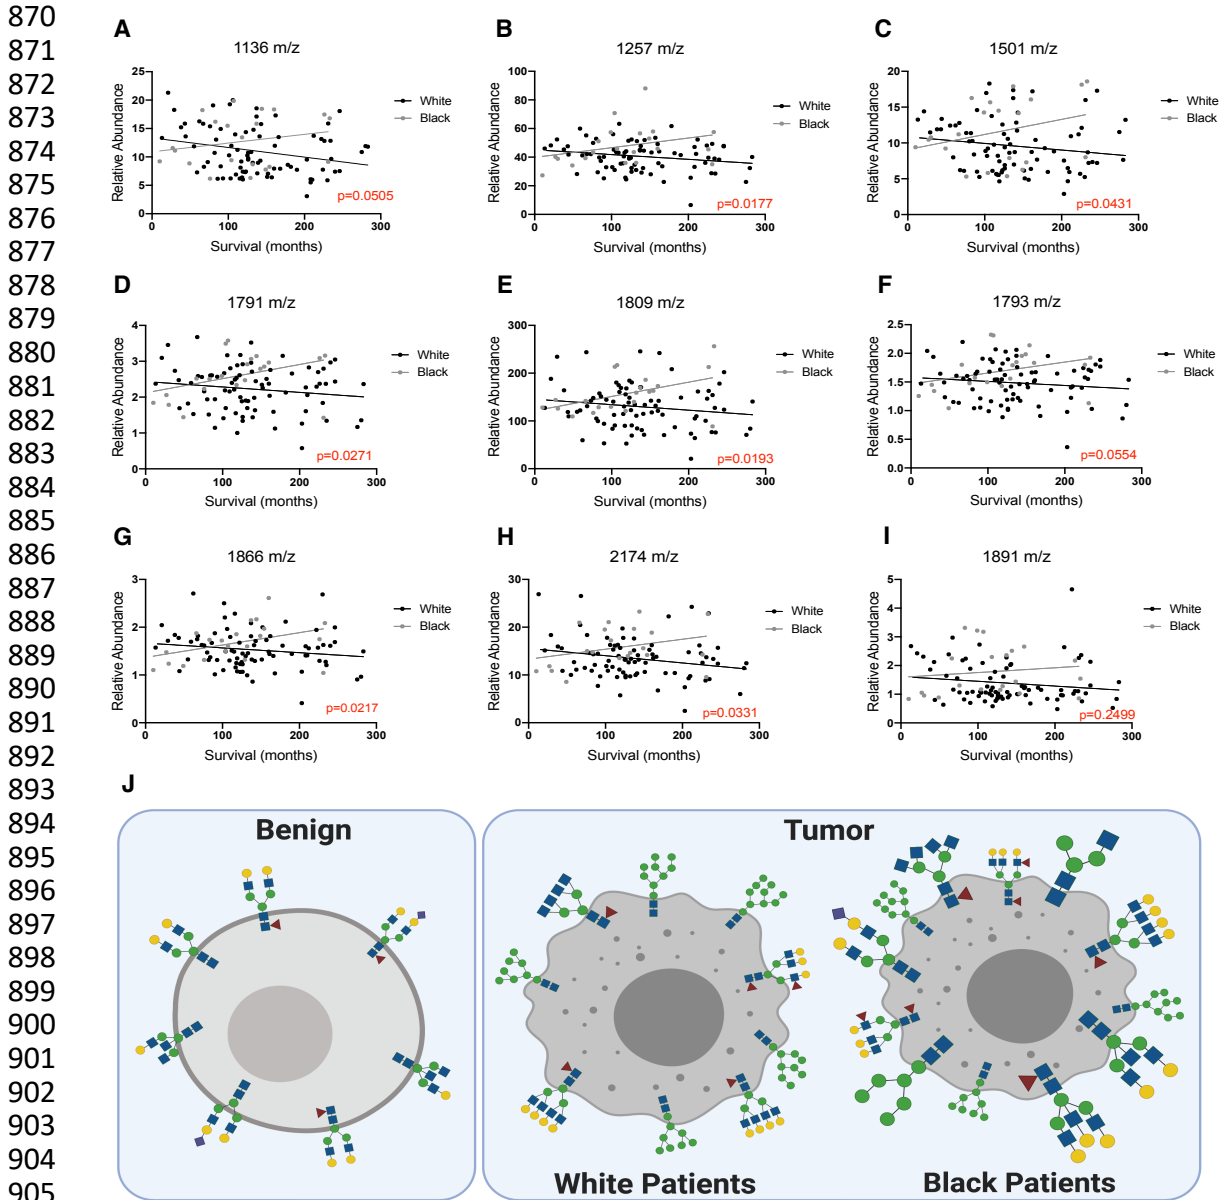

907 **Figure 6. N-glycan status of low grade prostate tumors of White and Black patients predict**  
908 **opposing trends in overall survival.** Correlation of relative abundance to overall patient survival  
909 for (A) 1136 m/z (pauci-mannose), (B) 1257 m/z (pauci-mannose), (C) 1501 m/z (bi-antennary  
910 complex), (D) 1791 m/z (sialylated), (E) 1809 m/z (core fucosylated), (F) 1793 m/z (core  
911 fucosylated), (G) 1866 m/z (bisecting), (H) 2174 m/z (bisecting/core fucosylated), and (I) 1891 m/z  
912 (tetra-antennary complex/core fucosylated). Data are plotted as individual patient samples, analyzed  
913 by simple linear regression analysis. White (n=81) and Black (n=21). p values are displayed in red  
914 for each glycan. (J) Illustration of the N-glycan profile of benign prostate tissue compared to low  
915 grade tumors from White and Black prostate cancer patients.

916  
917  
918  
919  
920
